# Supplementary material
Source: Springer Nature journal article supplement (https://www.springermedizin.de/resource/supplementary/12911_2009_332_MOESM8_ESM.pdf/9525496)
Supplement: MOESM8 [file 9525496]

```

# Definition of the treatment components
diet = Component("Diet and physical activity")
oral_antidiabetic = Component("Any oral antidiabetic drug", ["A10B"])
metformin = Component("Metformin", ["A10BA02"])
agi = Component("AlphaglucoSIDase inhibitor", ["A10BF"])
[...]

# Recommendation for antidiabetic monotherapy for patient with low glycosilated haemoglobin
one_should_prescribe(
  conditions = "(Treatment([diet, oral_antidiabetic], status = PRESCRIBED)) and (patient.HbA1c <=
6.5)",
  recommended_treatment_line1 = [Treatment([diet, metformin])],
  recommended_treatment_line2 = [Treatment([diet, agi])],
  explanation_criticism_label2 = "AGI should be prescribed only as second-line treatment.",
  explanation_criticism_label3 = "Sulfonamides, glinides and glitazones are not recommended at this
stage of the disease.",
  advice_criticism_label1 = "Guideline recommends metformin as first-line treatment.",
  advice_criticism_label2 = "Guideline recommends metformin as first-line treatment, and AGI as
second-line.",
  reference_criticism_label = "(Traitement medicamenteux du diabete de type 2)")

```
